# Supplementary material for: Semiconducting polymer contributes favorably to the Seebeck coefficient in multi-component, high-performance n-type thermoelectric nanocomposites
Source: Royal Society of Chemistry journal article supplement (doi:10.1039/d0ta02388d), 2020-01-01
Supplement: d0ta02388d1.pdf [file d0ta02388d1.pdf]

## Supplementary Information

### Semiconducting polymer contributes favorably to the Seebeck coefficient in multi-component, high-performance n-type thermoelectric nanocomposites

Junhui Tang,<sup>a</sup> Ruisi Chen,<sup>a</sup> Lidong Chen,<sup>b</sup> Guillermo C. Bazan,<sup>c</sup> and Ziqi Liang<sup>\*a</sup>

<sup>a</sup>Department of Materials Science, Fudan University, Shanghai 200433, China. Email: zqliang@fudan.edu.cn

<sup>b</sup>State Key Laboratory of High Performance Ceramics and Superfine Microstructure, Shanghai Institute of Ceramics, Chinese Academy of Sciences, Shanghai 200050, China

<sup>c</sup>Department of Chemistry and Biochemistry & Department of Materials Science, University of California at Santa Barbara, CA 93106-9510, USA

## Results

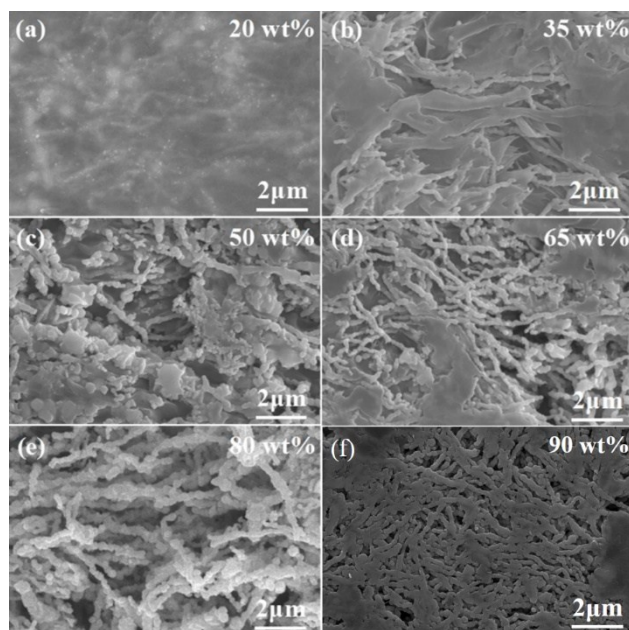

**Fig. S1.** Top-view FE-SEM images of magnetically aligned Co NWs/N2200 TENCs with various Co NWs contents.

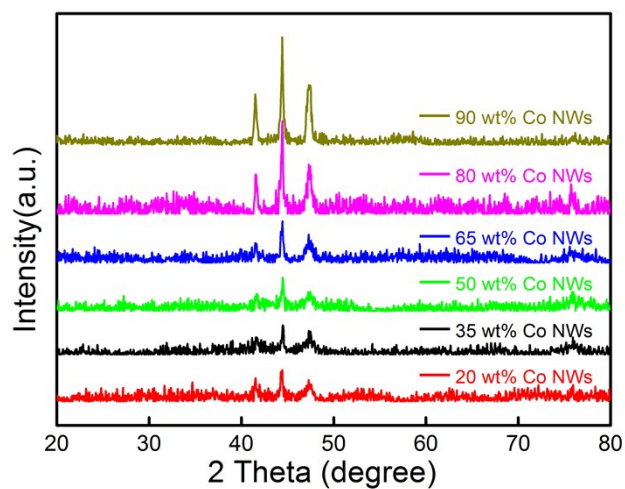

**Fig. S2.** XRD patterns of magnetically aligned Co NWs/N2200 TENCs.

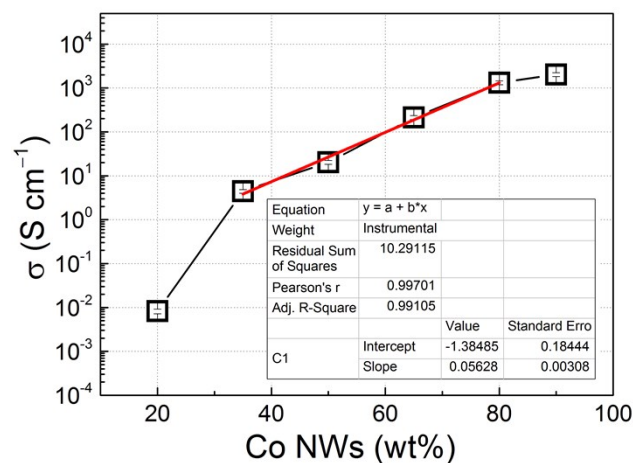

**Fig. S3.** The electrical conductivity of Co NWs/N2200 TENCs as a function of the Co NWs content at room temperature. The red line is the linear fitting curve between Co NWs content of 35 and 80 wt%.

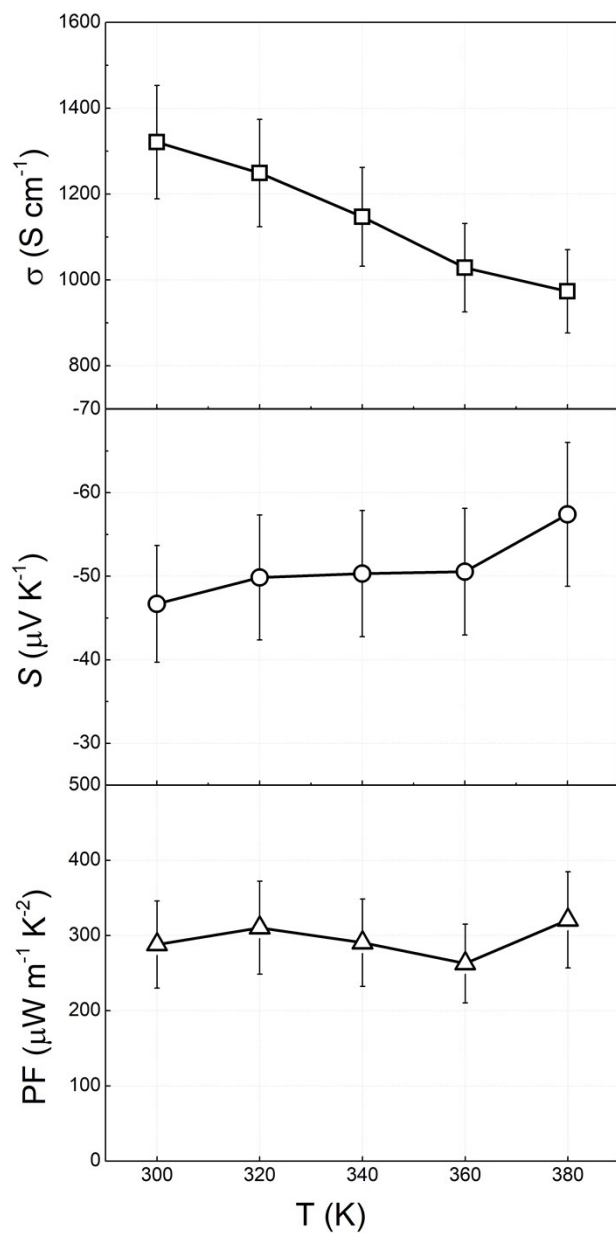

**Fig. S4.** Temperature dependences of average TE properties of the optimal Co NWs (80 wt%)/N2200 TENCs.

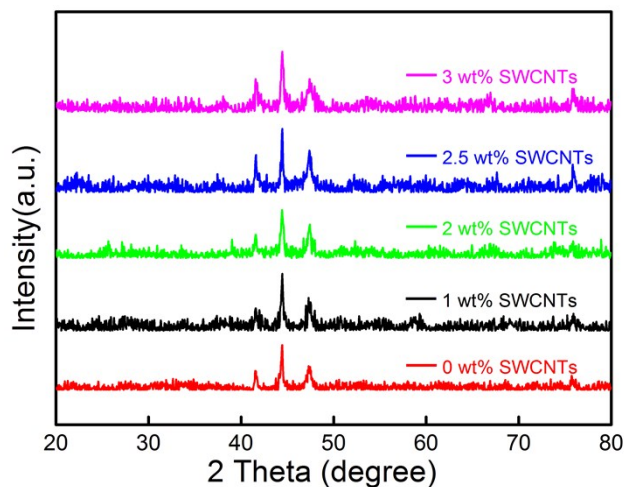

**Fig. S5.** XRD patterns of Co NWs/N2200/SWCNTs TENCs with different portions of SWCNT when the Co NWs:N2200 ratio is 4:1 wt%.

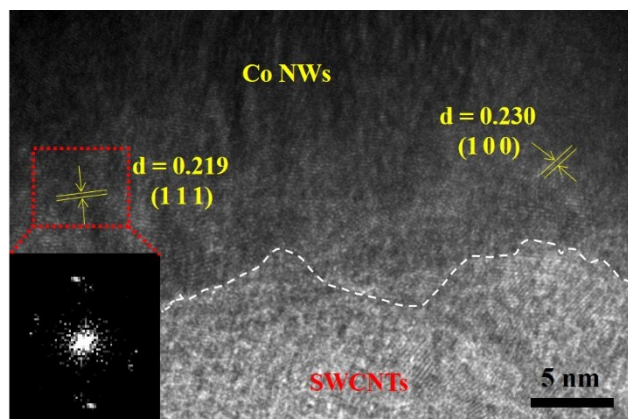

**Fig. S6.** HR-TEM image of ternary TENC with 2 wt% SWCNTs. The inset shows fast Fourier transform (FFT) analysis of the red dotted box area.

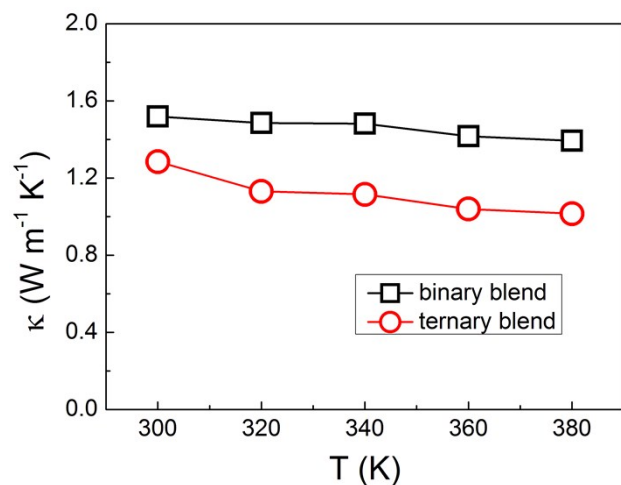

**Fig. S7.** Temperature dependences of average thermal conductivity of the optimal Co NWs/N2200 binary TENCs and Co NWs/N2200/SWCNTs ternary TENCs.

**Table S1.** The TE properties of TBAB-doped n-type SWCNTs

| w(TBAB):w(SWCNTs) | $S$ ( $\mu\text{V K}^{-1}$ ) | $\sigma$ ( $\text{S cm}^{-1}$ ) | PF ( $\mu\text{W m}^{-1} \text{K}^{-2}$ ) |
|-------------------|------------------------------|---------------------------------|-------------------------------------------|
| 10:3              | -42.6                        | 349.2                           | 63.4                                      |
| 10:5              | -46.7                        | 662.9                           | 144.6                                     |
| 10:7              | -40.9                        | 477.9                           | 79.9                                      |
| 10:10             | -40.5                        | 549.3                           | 90.1                                      |
| 10:20             | -40.2                        | 561.5                           | 90.7                                      |

**Table S2.** Comparison of zTs versus temperature for Co NWs/N2200/SWCNTs and Co NWs/PVDF TENCs

| Sample              | 300 K | 320 K | 340 K | 360 K | 380 K |
|---------------------|-------|-------|-------|-------|-------|
| Co NWs/PVDF         | 0.053 | 0.066 | 0.063 | 0.061 | 0.068 |
| Co NWs/N2200/SWCNTs | 0.086 | 0.105 | 0.129 | 0.154 | 0.181 |
